# Supplementary material for: The role of transcription factor caudal-related homeobox transcription factor 2 in colorectal cancer
Source: PubMed Central journal article supplement — Tzu Chi Med J. 2020 Jul 24;32(4):305–11. doi: 10.4103/tcmj.tcmj_49_20 (PMC7605288; doi:10.4103/tcmj.tcmj_49_20), 2020-07-24
Supplement: TCMJ-32-305_Suppl1.pdf [file TCMJ-32-305_Suppl1.pdf]

## SUPPLEMENTAL MATERIALS

### Cancer cell lines cited in the text

**Reference 17: Cell lines used by Salari *et al.***

CACO2, COLO205, COLO320, COLO741, DLD1, HCA7, HCT116, HCT15, HT29, LoVo, LS174T, LS180, LS411, NCI-H508, NCI-H747, SKCO1, SNUC2B, SW1116, SW1417, SW403, SW48, SW480, SW620, SW837, SW948, and T84.

**Reference 33: Cell lines used by Fan *et al.***

IPEC-J2.

**Reference 34: Cell lines used by Escaffit *et al.***

HIEC.

**Reference 35 and 36: Cell lines used by Zheng *et al.***

LoVo.

**Reference 37: Cell lines used by Yu *et al.***

HT-29 and Caco-2.

**Reference 38: Cell lines used by Olsen *et al.***

Caco-2, SW480, RKO and Hela.

**Reference 39: Cell lines used by Hinkel *et al.***

Caco-2/TC7, HCT116, HT29, T84, SW480 and HEK293.

**Reference 40: Cell lines used by Dhawan *et al.***

HCT116, HT29, SW480, SW620, and RIE.

**Reference 41: Cell lines used by Bhat *et al.***

HCT116, SW480, MDCK-II, MCF-7.

**Reference 42: Cell lines used by Johnson *et al.***

HCT116.

**Reference 43: Cell lines used by Graule *et al.***

LS174T, T84, LS180, HCT15, HT29, SW620, COLO205, HCT116, COLO320, LoVo and CaCo2.

**Reference 44: Cell lines used by Mallo *et al.***

HT29.

**Reference 45: Cell lines used by Soubeyran *et al.***

HT29

**Reference 46: Cell lines used by Bai *et al.***

SAOS-2, U-2OS, GT3TKB and HT-29.

**Reference 47: Cell lines used by Boulanger *et al.***

Caco-2/15 and HEK293.

**Reference 48: Cell lines used by Aoki *et al.***

DLD-1 and LS174T

**Reference 49: Cell lines used by Boyd *et al.***

Caco-2.

**Reference 50: Cell lines used by Okuda *et al.***

HeLa.

**Reference 51: Cell lines used by Munemitsu *et al.***

SW480 and HEK293.

**Reference 53: Cell lines used by Xu *et al.***

RGM-1.

**Reference 54: Cell lines used by Zhang *et al.***

HEK293T, U87 and U251.

**Reference 55: Cell lines used by Thoene *et al.***

Nalm6.

**Reference 56: Cell lines used by Gross *et al.***

Caco-2/TC7 and SW480.

**Reference 59: Cell lines used by Witek *et al.***

T84

**Reference 62: Cell lines used by Zheng *et al.***

SW480 and LS174T.

**Reference 63: Cell lines used by Coskun *et al.***

Caco-2.

**Reference 64: Cell lines used by Brabletz *et al.***

DLD1, Caco-2, LS174T and HEK293.

**Reference 65: Cell lines used by Benahmed *et al.***

HT29, T84, and SW480.
